# Supplementary material for: The TgWRKY24 transcription factor is involved in releasing seed dormancy by responding to abscisic acid signals in Tulipa thianschanica
Source: Research Square preprint supplement (doi:10.21203/rs.3.rs-6879966/v1), 2025-07-23
Supplement: Supplementary file 1 [file b1bdf121fcb4446c9de961c9.xlsx]

## Sheet: Sheet1
Information on WRKY family members in the transcriptome
Gene_ID	Length	Trans_ID	Annotation	Name	swissprot_description	GO_Term	NOG	KOEntry	KODescription	EC	KEGG_Pathway	Pfam_description	TS_DR1	TS_DR3	TS_ND1	TS_ND2	TS_ND3	TS_PD1	TS_PD2	TS_PD3	1D	20D	40D
TRINITY_DN44890_c0_g2	1376	TRINITY_DN44890_c0_g2_i1;TRINITY_DN44890_c0_g2_i2;TRINITY_DN44890_c0_g2_i3;TRINITY_DN44890_c0_g2_i4	PREDICTED: probable WRKY transcription factor 31 [Nelumbo nucifera]	WRKY6	WRKY transcription factor 6 OS=Arabidopsis thaliana GN=WRKY6 PE=1 SV=1	GO:0003700(transcription factor activity, sequence-specific DNA binding);GO:0005515(protein binding);GO:0005634(nucleus);GO:0006351(transcription, DNA-templated);GO:0006355(regulation of transcription, DNA-templated);GO:0009873(ethylene-activated signaling pathway);GO:0010200(response to chitin);GO:0016036(cellular response to phosphate starvation);GO:0043565(sequence-specific DNA binding);GO:004…	ENOG410YDVM(Transcription factor)	K01892	histidyl-tRNA synthetase	EC:6.1.1.21	mtr00970(Aminoacyl-tRNA biosynthesis)	M0SBC7.1 PF03106.13;WRKY;	14.36	11.69	12.77	11.34	7.74	0.97	0.39	1.81	13.025	10.6167	1.05667
TRINITY_DN45366_c0_g1	1512	TRINITY_DN45366_c0_g1_i1;TRINITY_DN45366_c0_g1_i2;TRINITY_DN45366_c0_g1_i3;TRINITY_DN45366_c0_g1_i4;TRINITY_DN45366_c0_g1_i5	PREDICTED: probable WRKY transcription factor 25 [Phoenix dactylifera]	WRKY24	WRKY transcription factor WRKY24 OS=Oryza sativa subsp. japonica GN=WRKY24 PE=2 SV=1	GO:0003700(transcription factor activity, sequence-specific DNA binding);GO:0005515(protein binding);GO:0005634(nucleus);GO:0006351(transcription, DNA-templated);GO:0006355(regulation of transcription, DNA-templated);GO:0006970(response to osmotic stress);GO:0009408(response to heat);GO:0009409(response to cold);GO:0009414(response to water deprivation);GO:0009651(response to salt stress);GO:0010…	ENOG4112BTF(WRKY transcription factor)	K13424	WRKY transcription factor 33	-	pda04626(Plant-pathogen interaction)	M0YCC4.1 PF03106.13;WRKY;	45.15	49.52	19	19.68	15.94	10.04	5.78	10.77	47.335	18.2067	8.86333
TRINITY_DN44806_c0_g3	799	TRINITY_DN44806_c0_g3_i1;TRINITY_DN44806_c0_g3_i2	PREDICTED: probable WRKY transcription factor 65 [Phoenix dactylifera]	WRKY65	Probable WRKY transcription factor 65 OS=Arabidopsis thaliana GN=WRKY65 PE=2 SV=1	GO:0003700(transcription factor activity, sequence-specific DNA binding);GO:0005634(nucleus);GO:0006351(transcription, DNA-templated);GO:0006355(regulation of transcription, DNA-templated);GO:0043565(sequence-specific DNA binding)	ENOG410YK4F(WRKY transcription factor)	K13425	WRKY transcription factor 22	-	pop04626(Plant-pathogen interaction)	A0A078EFA4.1 PF03106.13;WRKY;	4.9	3.06	2.11	5.05	6.54	3	5.18	3.5	3.98	4.56667	3.89333
TRINITY_DN45985_c1_g2	702	TRINITY_DN45985_c1_g2_i1	putative WRKY transcription factor 40 [Ananas comosus]	WRKY71	WRKY transcription factor WRKY71 OS=Oryza sativa subsp. indica GN=WRKY71 PE=1 SV=1	GO:0003700(transcription factor activity, sequence-specific DNA binding);GO:0005634(nucleus);GO:0006952(defense response);GO:0009685(gibberellin metabolic process)	ENOG410YHES(WRKY transcription factor)	K18835	WRKY transcription factor 2	-	mus04626(Plant-pathogen interaction)	M7ZPT1.1 PF03106.13;WRKY;	1.54	1.28	4.79	4.36	3.57	0.21	0.16	0.26	1.41	4.24	0.21
TRINITY_DN44806_c0_g1	762	TRINITY_DN44806_c0_g1_i1	PREDICTED: probable WRKY transcription factor 11 [Elaeis guineensis]	WRKY11	Probable WRKY transcription factor 11 OS=Arabidopsis thaliana GN=WRKY11 PE=2 SV=2	GO:0003700(transcription factor activity, sequence-specific DNA binding);GO:0005516(calmodulin binding);GO:0005634(nucleus);GO:0006351(transcription, DNA-templated);GO:0006355(regulation of transcription, DNA-templated);GO:0010200(response to chitin);GO:0042742(defense response to bacterium);GO:0043565(sequence-specific DNA binding)	ENOG410YD1E(WRKY transcription factor)	-	-	-	-	M0SC35.1 PF10533.7;Plant_zn_clust;	26.71	21.59	13.04	12.42	11.24	17.03	20.04	19.9	24.15	12.2333	18.99
TRINITY_DN34914_c1_g2	1080	TRINITY_DN34914_c1_g2_i1	PREDICTED: probable WRKY transcription factor 28 [Phoenix dactylifera]	WRKY28	Probable WRKY transcription factor 28 OS=Arabidopsis thaliana GN=WRKY28 PE=2 SV=1	GO:0003700(transcription factor activity, sequence-specific DNA binding);GO:0005634(nucleus);GO:0006351(transcription, DNA-templated);GO:0006355(regulation of transcription, DNA-templated);GO:0043565(sequence-specific DNA binding)	ENOG410YIC2(Transcription factor)	K13424	WRKY transcription factor 33	-	mus04626(Plant-pathogen interaction)	K7V474.1 PF03106.13;WRKY;	4.18	4.77	3.66	4.03	3.65	0.69	0.74	0.14	4.475	3.78	0.523333
TRINITY_DN32445_c2_g2	914	TRINITY_DN32445_c2_g2_i1;TRINITY_DN32445_c2_g2_i2;TRINITY_DN32445_c2_g2_i3;TRINITY_DN32445_c2_g2_i4	PREDICTED: probable WRKY transcription factor 65 [Vitis vinifera]	WRKY69	Probable WRKY transcription factor 69 OS=Arabidopsis thaliana GN=WRKY69 PE=2 SV=1	GO:0003700(transcription factor activity, sequence-specific DNA binding);GO:0005634(nucleus);GO:0006351(transcription, DNA-templated);GO:0006355(regulation of transcription, DNA-templated);GO:0009555(pollen development);GO:0009793(embryo development ending in seed dormancy);GO:0043565(sequence-specific DNA binding)	ENOG4111ACC(WRKY)	K13425	WRKY transcription factor 22	-	aly04626(Plant-pathogen interaction)	A0A061DT66.1 PF03106.13;WRKY;	3.62	3.26	3.43	4.74	3.39	0.98	0.24	0.33	3.44	3.85333	0.516667
TRINITY_DN36382_c0_g2	1547	TRINITY_DN36382_c0_g2_i1;TRINITY_DN36382_c0_g2_i2;TRINITY_DN36382_c0_g2_i3	PREDICTED: probable WRKY transcription factor 4 [Elaeis guineensis]	WRKY4	Probable WRKY transcription factor 4 OS=Arabidopsis thaliana GN=WRKY4 PE=1 SV=2	GO:0003677(DNA binding);GO:0003700(transcription factor activity, sequence-specific DNA binding);GO:0005634(nucleus);GO:0006351(transcription, DNA-templated);GO:0006355(regulation of transcription, DNA-templated);GO:0006952(defense response);GO:0009723(response to ethylene);GO:0009751(response to salicylic acid);GO:0009753(response to jasmonic acid);GO:0043565(sequence-specific DNA binding);GO:00…	ENOG410YBRT(Transcription factor)	K18835	WRKY transcription factor 2	-	spen04626(Plant-pathogen interaction)	A0A061EGN1.1 PF03106.13;WRKY;	4.43	7.71	3.02	4	2.11	0.46	1.1	0.41	6.07	3.04333	0.656667
TRINITY_DN45985_c1_g1	1080	TRINITY_DN45985_c1_g1_i1;TRINITY_DN45985_c1_g1_i2;TRINITY_DN45985_c1_g1_i3;TRINITY_DN45985_c1_g1_i4;TRINITY_DN45985_c1_g1_i5;TRINITY_DN45985_c1_g1_i6	PREDICTED: probable WRKY transcription factor 40 isoform X1 [Elaeis guineensis]	WRKY40	Probable WRKY transcription factor 40 OS=Arabidopsis thaliana GN=WRKY40 PE=1 SV=1	GO:0002237(response to molecule of bacterial origin);GO:0003700(transcription factor activity, sequence-specific DNA binding);GO:0005515(protein binding);GO:0005634(nucleus);GO:0006351(transcription, DNA-templated);GO:0006355(regulation of transcription, DNA-templated);GO:0009611(response to wounding);GO:0009751(response to salicylic acid);GO:0010200(response to chitin);GO:0031347(regulation of d…	ENOG410YHES(WRKY transcription factor)	K18834	WRKY transcription factor 1	-	pper04626(Plant-pathogen interaction)	M0TIX1.1 PF03106.13;WRKY;	2.75	2.01	4.5	3.11	3.15	0.29	0.15	0.02	2.38	3.58667	0.153333
TRINITY_DN42980_c0_g1	1288	TRINITY_DN42980_c0_g1_i1	PREDICTED: probable WRKY transcription factor 20 [Nelumbo nucifera]	WRKY46	WRKY transcription factor SUSIBA2 OS=Hordeum vulgare GN=WRKY46 PE=1 SV=1	GO:0003700(transcription factor activity, sequence-specific DNA binding);GO:0005634(nucleus);GO:0006351(transcription, DNA-templated);GO:0006355(regulation of transcription, DNA-templated);GO:0009611(response to wounding);GO:0009961(response to 1-aminocyclopropane-1-carboxylic acid);GO:0043565(sequence-specific DNA binding);GO:0045893(positive regulation of transcription, DNA-templated)	ENOG4112BTF(WRKY transcription factor)	K18835	WRKY transcription factor 2	-	nnu04626(Plant-pathogen interaction)	F6HRV5.1 PF03106.13;WRKY;	3.9	5.1	3.18	3.36	3.46	0.24	0	0.06	4.5	3.33333	0.1
TRINITY_DN35433_c0_g1	1355	TRINITY_DN35433_c0_g1_i1;TRINITY_DN35433_c0_g1_i10;TRINITY_DN35433_c0_g1_i11;TRINITY_DN35433_c0_g1_i12;TRINITY_DN35433_c0_g1_i13;TRINITY_DN35433_c0_g1_i14;TRINITY_DN35433_c0_g1_i15;TRINITY_DN35433_c0_g1_i2;TRINITY_DN35433_c0_g1_i3;TRINITY_DN35433_c0_g1_i4;TRINITY_DN35433_c0_g1_i5;TRINITY_DN35433_c0_g1_i6;TRINITY_DN35433_c0_g1_i7;TRINITY_DN35433_c0_g1_i8;TRINITY_DN35433_c0_g1_i9	PREDICTED: probable WRKY transcription factor 11 [Elaeis guineensis]	WRKY11	Probable WRKY transcription factor 11 OS=Arabidopsis thaliana GN=WRKY11 PE=2 SV=2	GO:0003700(transcription factor activity, sequence-specific DNA binding);GO:0005516(calmodulin binding);GO:0005634(nucleus);GO:0006351(transcription, DNA-templated);GO:0006355(regulation of transcription, DNA-templated);GO:0010200(response to chitin);GO:0042742(defense response to bacterium);GO:0043565(sequence-specific DNA binding)	ENOG410YD1E(WRKY transcription factor)	K13426	WRKY transcription factor 29	-	mdm04626(Plant-pathogen interaction)	G7K597.1 PF03106.13;WRKY;	7.92	6.63	5.6	7.01	4.84	3.26	3.06	3.36	7.275	5.81667	3.22667
TRINITY_DN38275_c0_g1	1135	TRINITY_DN38275_c0_g1_i1;TRINITY_DN38275_c0_g1_i10;TRINITY_DN38275_c0_g1_i2;TRINITY_DN38275_c0_g1_i3;TRINITY_DN38275_c0_g1_i4;TRINITY_DN38275_c0_g1_i5;TRINITY_DN38275_c0_g1_i6;TRINITY_DN38275_c0_g1_i7;TRINITY_DN38275_c0_g1_i8;TRINITY_DN38275_c0_g1_i9	WRKY transcription factor 48 family protein [Populus trichocarpa]	WRKY23	Probable WRKY transcription factor 23 OS=Arabidopsis thaliana GN=WRKY23 PE=2 SV=1	GO:0003700(transcription factor activity, sequence-specific DNA binding);GO:0005634(nucleus);GO:0006351(transcription, DNA-templated);GO:0006355(regulation of transcription, DNA-templated);GO:0009624(response to nematode);GO:0009733(response to auxin);GO:0043565(sequence-specific DNA binding)	ENOG410YRNP(Transcription factor)	K13424	WRKY transcription factor 33	-	vra04626(Plant-pathogen interaction)	M0UA16.1 PF03106.13;WRKY;	15.8	12.58	10.45	12.13	8.81	19.82	27.61	35.5	14.19	10.4633	27.6433
TRINITY_DN37799_c0_g2	897	TRINITY_DN37799_c0_g2_i1;TRINITY_DN37799_c0_g2_i2	PREDICTED: probable WRKY transcription factor 65 isoform X2 [Elaeis guineensis]	WRKY65	Probable WRKY transcription factor 65 OS=Arabidopsis thaliana GN=WRKY65 PE=2 SV=1	GO:0003700(transcription factor activity, sequence-specific DNA binding);GO:0005634(nucleus);GO:0006351(transcription, DNA-templated);GO:0006355(regulation of transcription, DNA-templated);GO:0043565(sequence-specific DNA binding)	ENOG410YK4F(WRKY transcription factor)	K13425	WRKY transcription factor 22	-	mtr04626(Plant-pathogen interaction)	V7CMU7.1 PF03106.13;WRKY;	4.1	3.12	5.95	5.74	5.04	0.28	0.52	0.68	3.61	5.57667	0.493333
TRINITY_DN30542_c0_g1	743	TRINITY_DN30542_c0_g1_i1;TRINITY_DN30542_c0_g1_i2	PREDICTED: probable WRKY transcription factor 75 [Elaeis guineensis]	WRKY75	Probable WRKY transcription factor 75 OS=Arabidopsis thaliana GN=WRKY75 PE=2 SV=1	GO:0000122(negative regulation of transcription from RNA polymerase II promoter);GO:0001046(core promoter sequence-specific DNA binding);GO:0003700(transcription factor activity, sequence-specific DNA binding);GO:0005634(nucleus);GO:0006351(transcription, DNA-templated);GO:0006355(regulation of transcription, DNA-templated);GO:0010055(atrichoblast differentiation);GO:0032107(regulation of respons…	ENOG410YM5M(WRKY)	K13424	WRKY transcription factor 33	-	tcc04626(Plant-pathogen interaction)	M1BSQ7.1 PF03106.13;WRKY;	0.75	2.58	3.97	7.05	5.46	0	0	0.17	1.665	5.49333	0.0566667
TRINITY_DN38442_c0_g1	861	TRINITY_DN38442_c0_g1_i1;TRINITY_DN38442_c0_g1_i2;TRINITY_DN38442_c0_g1_i3;TRINITY_DN38442_c0_g1_i4;TRINITY_DN38442_c0_g1_i5;TRINITY_DN38442_c0_g1_i6;TRINITY_DN38442_c0_g1_i7	PREDICTED: WRKY transcription factor 22-like [Musa acuminata subsp. malaccensis]	WRKY27	Probable WRKY transcription factor 27 OS=Arabidopsis thaliana GN=WRKY27 PE=2 SV=1	GO:0003700(transcription factor activity, sequence-specific DNA binding);GO:0005515(protein binding);GO:0005634(nucleus);GO:0006351(transcription, DNA-templated);GO:0006355(regulation of transcription, DNA-templated);GO:0007263(nitric oxide mediated signal transduction);GO:0009739(response to gibberellin);GO:0042742(defense response to bacterium);GO:0043565(sequence-specific DNA binding);GO:00458…	ENOG410YINN(WRKY transcription factor)	K13425	WRKY transcription factor 22	-	mdm04626(Plant-pathogen interaction)	M0TXQ5.1 PF03106.13;WRKY;	5.4	3.5	3.9	7.34	7.31	0.1	0.4	1.25	4.45	6.18333	0.583333
TRINITY_DN43637_c0_g2	1085	TRINITY_DN43637_c0_g2_i1	PREDICTED: probable WRKY transcription factor 2 [Elaeis guineensis]	WRKY34	Probable WRKY transcription factor 34 OS=Arabidopsis thaliana GN=WRKY34 PE=2 SV=1	GO:0003700(transcription factor activity, sequence-specific DNA binding);GO:0005634(nucleus);GO:0006351(transcription, DNA-templated);GO:0006355(regulation of transcription, DNA-templated);GO:0009409(response to cold);GO:0009555(pollen development);GO:0009846(pollen germination);GO:0043565(sequence-specific DNA binding)	ENOG4112BTF(WRKY transcription factor)	K18835	WRKY transcription factor 2	-	egu04626(Plant-pathogen interaction)	M0YCC4.1 PF03106.13;WRKY;	8.94	10.04	3.2	4.75	3.54	5.08	4.05	3.29	9.49	3.83	4.14
TRINITY_DN37900_c1_g1	1535	TRINITY_DN37900_c1_g1_i1	PREDICTED: probable WRKY transcription factor 4 isoform X1 [Phoenix dactylifera]	WRKY4	Probable WRKY transcription factor 4 OS=Arabidopsis thaliana GN=WRKY4 PE=1 SV=2	GO:0003677(DNA binding);GO:0003700(transcription factor activity, sequence-specific DNA binding);GO:0005634(nucleus);GO:0006351(transcription, DNA-templated);GO:0006355(regulation of transcription, DNA-templated);GO:0006952(defense response);GO:0009723(response to ethylene);GO:0009751(response to salicylic acid);GO:0009753(response to jasmonic acid);GO:0043565(sequence-specific DNA binding);GO:00…	ENOG410YHVA(WRKY transcription factor)	K13424	WRKY transcription factor 33	-	vra04626(Plant-pathogen interaction)	M0U8S7.1 PF03106.13;WRKY;	6.16	7.81	2.89	4.4	2.75	1	0.49	0.32	6.985	3.34667	0.603333
TRINITY_DN41606_c1_g1	755	TRINITY_DN41606_c1_g1_i1;TRINITY_DN41606_c1_g1_i2;TRINITY_DN41606_c1_g1_i3;TRINITY_DN41606_c1_g1_i4;TRINITY_DN41606_c1_g1_i5;TRINITY_DN41606_c1_g1_i6;TRINITY_DN41606_c1_g1_i7	PREDICTED: probable WRKY transcription factor 70 [Phoenix dactylifera]	WRKY70	Probable WRKY transcription factor 70 OS=Arabidopsis thaliana GN=WRKY70 PE=2 SV=1	GO:0003700(transcription factor activity, sequence-specific DNA binding);GO:0005515(protein binding);GO:0005634(nucleus);GO:0006351(transcription, DNA-templated);GO:0006355(regulation of transcription, DNA-templated);GO:0009751(response to salicylic acid);GO:0009753(response to jasmonic acid);GO:0009862(systemic acquired resistance, salicylic acid mediated signaling pathway);GO:0009864(induced sy…	ENOG410YZZY(Transcription factor)	K18835	WRKY transcription factor 2	-	pop04626(Plant-pathogen interaction)	M0SWH8.1 PF03106.13;WRKY;	2.35	2.79	4.28	5.13	4.57	0.7	0.15	0.24	2.57	4.66	0.363333
