# Supplementary material for: The TgWRKY24 transcription factor is involved in releasing seed dormancy by responding to abscisic acid signals in Tulipa thianschanica
Source: Research Square preprint supplement (doi:10.21203/rs.3.rs-6879966/v1), 2025-07-23
Supplement: Supplementary file 2 [file d69d3917cf458c37cfe35d48.xlsx]

## Sheet: Sheet 1
Correlation analysis of TgWRKYs genes with the change of ABA content
Data1	Data2	rho	pvalue	relation
ABA	TgWRKY6	-0.99578	0.05851	negtive
ABA	TgWRKY24	-0.851496	0.0351391180362203	negtive
ABA	TgWRKY28	-0.995018	0.0635733	negtive
ABA	TgWRKY69	-0.93721	0.226798137288519	negtive
ABA	TgWRKY4	-0.960624	0.179245	negtive
ABA	TgWRKY40	-0.979615	0.128764	negtive
ABA	TgWRKY46	-0.999355	0.0228699	negtive
ABA	TgWRKY11	-0.999594	0.018139	negtive
ABA	TgWRKY65	-0.927156	0.244492	negtive
ABA	TgWRKY75	-0.662268	0.539188	negtive
ABA	TgWRKY27	-0.790183	0.419971	negtive
ABA	TgWRKY34	-0.655236	0.545139	negtive
ABA	TgWRKY32	-0.974168	0.145016	negtive
ABA	TgWRKY70	-0.838237	0.367174	negtive
ABA	TgWRKY23	0.948234	0.205735	positive
